# Supplementary material for: Message framing and counseling of parents on children’s physical activity – an experimental study
Source: PubMed Central journal article supplement (PMC8114350; doi:10.1080/21642850.2018.1515018), 2018-08-27

Spaghetti plot - Positive frame

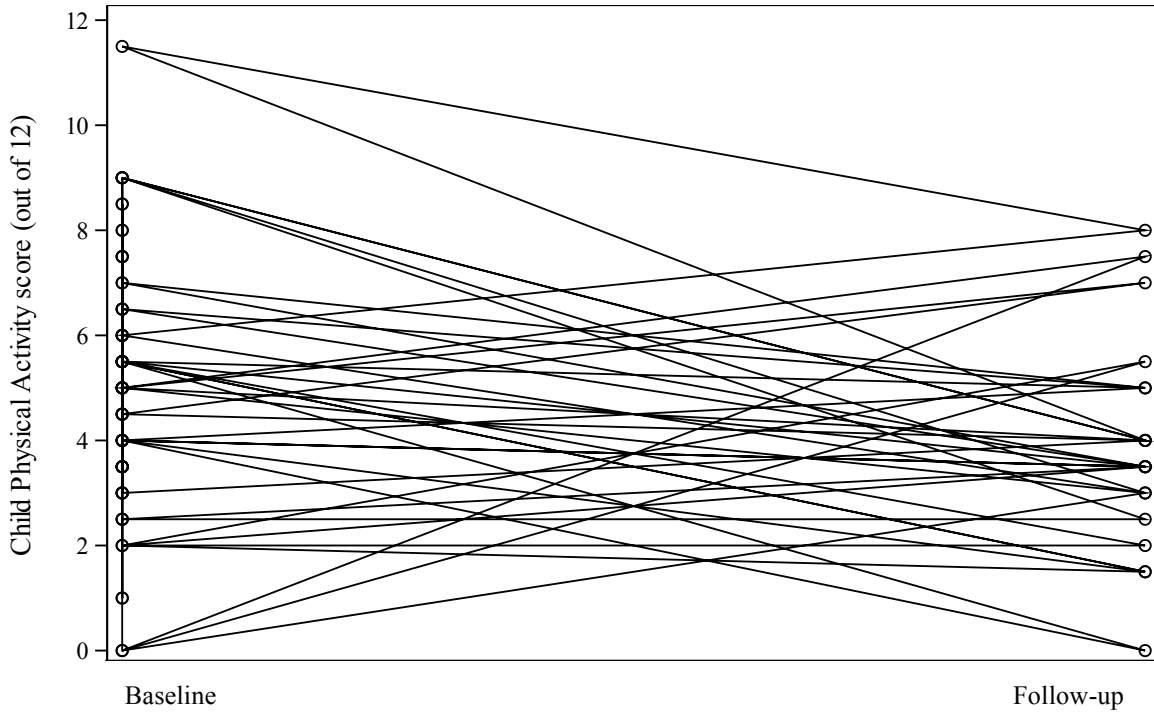

Spaghetti plot - Negative frame

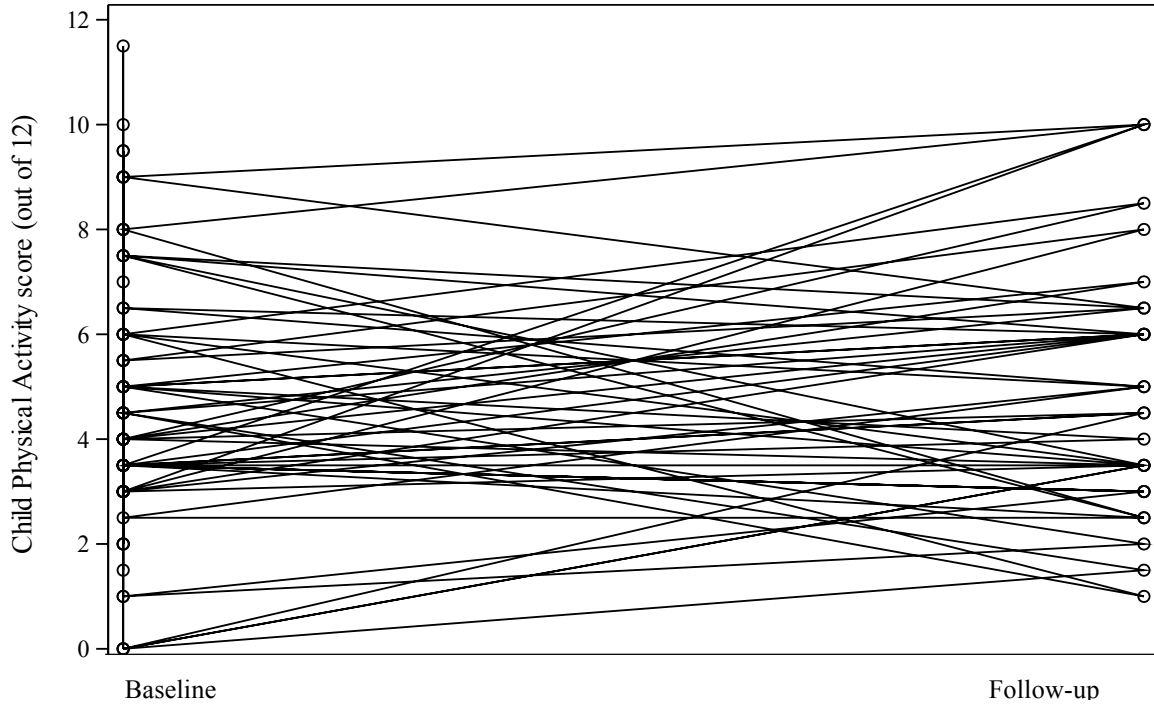

Supplement: RHPB_A_1515018_SM3922.pdf [file RHPB_A_1515018_SM3922.pdf]
